# Supplementary material for: Non-covalent binding of fullerenes and biomolecules at surface-supported metallosupramolecular receptors
Source: Royal Society of Chemistry journal article supplement (doi:10.1039/b603003c), 2006-01-01
Supplement: b603003c.pdf [file b603003c.pdf]

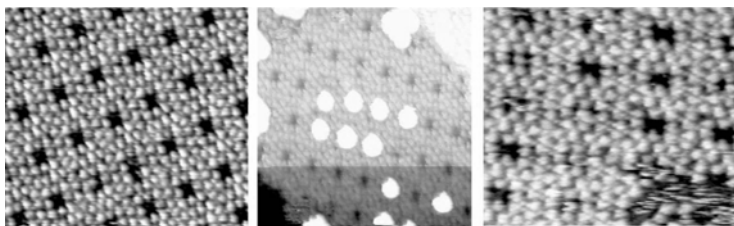

Electronic Supplementary Information (ESI): The STM data showing the nanocavities upon the thermal releasing of the guest species (cystine, C<sub>60</sub> and Phe-Phe, from left to right, respectively).
